# Supplementary material
Source: PubMed Central journal article supplement (PMC5768412)
Supplement: NIHMS929841-supplement-supplement_1.pdf [file NIHMS929841-supplement-supplement_1.pdf]

**Supplementary Table 1.** Age-adjusted characteristics of cases by tumor CASR expression availability in the combined study

|                                                 | CASR unavailable cases (N = 2,957) | CASR available cases (N = 809) |
|-------------------------------------------------|------------------------------------|--------------------------------|
| Age, years*                                     | 67.9(10.2)                         | 69.1(8.8)                      |
| White, %                                        | 96.8                               | 96.7                           |
| Body mass index, <sup>a</sup> kg/m <sup>2</sup> | 26.0(5.1)                          | 26.5(4.8)                      |
| Activity, <sup>b</sup> MET-hours/week           | 17.4(20.3)                         | 17.8(21.0)                     |
| Tumor location*                                 |                                    |                                |
| Proximal colon, %                               | 38.8                               | 49.6                           |
| Distal colon, %                                 | 29.8                               | 29.1                           |
| Rectum, %                                       | 21.9                               | 19.9                           |
| Unspecified, %                                  | 9.5                                | 1.4                            |
| Disease stage*                                  |                                    |                                |
| Stage I, %                                      | 23.2                               | 23.6                           |
| Stage II, %                                     | 19.8                               | 31.4                           |
| Stage III, %                                    | 20.3                               | 27.1                           |
| Stage IV, %                                     | 17.3                               | 14.2                           |
| In situ or unknown, %                           | 19.4                               | 3.7                            |
| Tumor differentiation*                          |                                    |                                |
| Well, %                                         | 12.0                               | 12.0                           |
| Moderate, %                                     | 49.7                               | 63.7                           |
| Poor, %                                         | 16.4                               | 16.4                           |
| Unspecified, %                                  | 12.0                               | 12.0                           |

Values are means (SD) or percentages and are standardized to the age distribution of the study population.

Values of polytomous variables may not sum to 100% due to rounding.

<sup>a</sup> Body mass index was calculated as weight in kilograms divided by the square of height in meters.

<sup>b</sup> Hours of metabolic equivalent tasks.

\* Value is not age adjusted

**Supplementary Table 2.** Association\* of tumor CASR expression with colorectal cancer-specific mortality according to disease stage and tumor differentiation in the Nurses' Health Study and Health Professionals Follow-Up Study

|                                          | Tumor CASR expression |                  |                  | p-trend | p-interaction |
|------------------------------------------|-----------------------|------------------|------------------|---------|---------------|
|                                          | 0-1<br>No/weak        | 2<br>Moderate    | 3<br>Intense     |         |               |
| Tumor differentiation (well to moderate) |                       |                  |                  |         |               |
| N death (151)                            | 28                    | 91               | 32               |         |               |
| N patients (613)                         | 110                   | 346              | 157              |         |               |
| Multivariable-adjusted*                  | 1 (reference)         | 1.06 (0.66-1.70) | 0.70 (0.40-1.24) | 0.16    | 0.18          |
| Tumor differentiation (poor)             |                       |                  |                  |         |               |
| N death (60)                             | 16                    | 36               | 8                |         |               |
| N patients (131)                         | 33                    | 77               | 22               |         |               |
| Multivariable-adjusted*                  | 1 (reference)         | 0.79 (0.30-1.84) | 0.33 (0.07-1.31) | 0.16    |               |
| Stage I-II                               |                       |                  |                  |         |               |
| N death (54)                             | 8                     | 35               | 11               |         |               |
| N patients (448)                         | 88                    | 249              | 111              |         |               |
| Multivariable-adjusted*                  | 1 (reference)         | 1.39 (0.61-3.15) | 0.78 (0.29-2.13) | 0.49    | 0.42          |
| Stage III-IV                             |                       |                  |                  |         |               |
| N death (172)                            | 39                    | 104              | 31               |         |               |
| N patients (331)                         | 61                    | 198              | 72               |         |               |
| Multivariable-adjusted*                  | 1 (reference)         | 0.67 (0.43-1.00) | 0.52 (0.31-0.88) | 0.02    |               |

\*\* Cox model were stratified by age groups at diagnosis, study (for the pooled analysis), and disease stage; we further adjusted for age at diagnosis, year of diagnosis, family history of colorectal cancer, tumor grade of differentiation, tumor subsite, LINE-1, MSI, CIMP, PTGS2, *KRAS*, *BRAF*, and *PIK3CA* mutations, nuclear expression of VDR and CTNNB1. There were 65 missing in tumor differentiation analysis and 30 missing in stage analysis.
